1 Developmental origins of exceptional health and survival: A four-  
2 generation family cohort study

3 Matthew Thomas Keys<sup>1\*</sup>; Dorthe Almind Pedersen<sup>1</sup>; Pernille Stemann Larsen<sup>1</sup>; Alexander Kulminski<sup>2</sup>;  
4 Mary F. Feitosa<sup>3</sup>; Mary Wojczynski<sup>3</sup>; Michael Province<sup>3</sup>; Kaare Christensen<sup>1,4</sup>

5 <sup>1</sup>Department of Epidemiology, Biostatistics, and Biodemography, University of Southern Denmark, Odense,  
6 Denmark

7 <sup>2</sup>Social Science Research Institute, Duke University, Durham, North Carolina, USA

8 <sup>3</sup>Department of Genetics, Washington University School of Medicine, St Louis, Missouri, USA

9 <sup>4</sup>Danish Ageing Research Centre, University of Southern Denmark, Odense, Denmark

10 \*Correspondence to: [mkeys@health.sdu.dk](mailto:mkeys@health.sdu.dk)

11 Word count: 6096 (excluding title page, abstracts, key messages, and references)

12 Short Abstract word count: 154

13 Structured Abstract word count: 241

14 Key messages word count: 122

15 Keywords: longevity, neonatal, developmental origins, life-course, multigenerational family study

16 Abbreviations: hazard ratio (HR), odds ratio (OR), longevity-enriched family (LEF), Long Life Family Study  
17 (LLFS), Generation 3 (G3), Generation 4 (G4)

**NOTE: This preprint reports new research that has not been certified by peer review and should not be used to guide clinical practice.**

## 18 **Short Abstract (154 words)**

19 Descendants of longevity-enriched sibships demonstrate a broad health and survival advantage throughout the life  
20 course. However, little is known about manifestations during very early life. Here we show a pattern of lower risk  
21 of adverse early life outcomes in third-generation grandchildren (N = 5637) of Danish longevity-enriched sibships  
22 compared to the general population, including infant mortality (Hazard Ratio = 0.53, 95% CI [0.36, 0.77]) and a  
23 range of neonatal health indicators. These associations in fourth-generation great-grandchildren (N = 14,908) were  
24 strongly attenuated and less consistent (e.g., infant mortality, Hazard Ratio = 0.90, [0.70, 1.17]). These dilatory  
25 patterns across successive generations were independent of stable socioeconomic and behavioural advantages  
26 (e.g., parental education and maternal smoking), maternal and paternal lines of transmission, as well as secular  
27 trends in the background population. Our findings suggest that exceptional health and survival may have early  
28 life developmental components and implicate heritable genetic and or epigenetic factors in their transmission.

## 29 **Structured Abstract (241 words)**

### 30 **Background**

31 Previous research has demonstrated potent health and survival advantages across three-generations in  
32 longevity-enriched families. However, the survival advantage associated with familial longevity may manifest  
33 earlier in life than previously thought.

### 34 **Methods**

35 We conducted a matched cohort study comparing early health trajectories in third-generation grandchildren (n =  
36 5,637) and fourth-generation great-grandchildren (n = 14,908) of longevity-enriched sibships to demographically  
37 matched births (n = 41,090) in Denmark between 1973 and 2018.

### 38 **Results**

39 Lower risk was observed across a range of adverse early life outcomes in the grandchildren, including infant  
40 mortality (Hazard Ratio (HR) = 0.53, 95% CI [0.36, 0.77]), preterm birth (Odds Ratio (OR) = 0.82, [0.72, 0.93]),  
41 small for gestational age (OR = 0.83, [0.76, 0.90]) and neonatal respiratory disorders (OR = 0.77, [0.67, 0.88]).  
42 Relative advantages in parental education and maternal smoking were observed in both generations to a similar  
43 degree. However, a much smaller reduction in infant mortality was observed in the great-grandchildren (HR =  
44 0.90, [0.70, 1.17]) and benefits across other outcomes were also less consistent, despite persisting socioeconomic  
45 and behavioural advantages. Lastly, maternal, and paternal lines of transmission were equipotent in the  
46 transmission of infant survival advantages.

### 47 **Conclusions**

48 Descendants of longevity-enriched sibships exhibit a broad health advantage manifesting as early the perinatal  
49 period. However, this effect is strongly diluted over successive generations. Our findings suggest that exceptional  
50 health and survival may have early developmental components and implicate heritable genetic and or epigenetic  
51 factors in their specific transmission.

## 52 Key Messages

- 53 • Previous research has demonstrated potent health and survival advantages across three-generations in  
54 longevity-enriched families. However, the survival advantage associated with familial longevity may  
55 manifest earlier in life than previously thought.
- 56 • In our study of third and fourth-generation descendants of longevity-enriched sibships, we observed a  
57 broad infant health and survival advantage reflected by protection against a diverse range of adverse birth  
58 outcomes.
- 59 • These advantages were strongly attenuated between the third and fourth generations, independent of  
60 otherwise stable socioeconomic and behavioural parental advantages, as well as maternal and paternal  
61 lines of transmission.
- 62 • Our findings suggest that familial aggregation of exceptional health and survival may have early life  
63 developmental components and triangulate to implicate heritable genetic and or epigenetic factors in  
64 their transmission.

## 65 Introduction

66 The study of long-lived persons is of key importance for understanding the mechanisms that confer protection  
67 against age-related morbidity.<sup>1</sup> Replicating their example more broadly in the face of aging populations has the  
68 potential to bring powerful social and economic benefits.<sup>2,3</sup> However, the diversity of aging trajectories within  
69 and across populations reflects the broad spectrum of its environmental and genetic determinants.<sup>4</sup> Studies  
70 assessing the combined impact of behavioral risk factors in mid- and late-life estimate that these alone may  
71 account for up to 10 to 14 years of life expectancy.<sup>5-8</sup> Studies of twins suggest a relatively modest contribution of  
72 genetic factors to variation in overall lifespan.<sup>9</sup> However, these factors likely become increasingly important in  
73 survival at advanced ages, which is further evidenced by the familial aggregation of exceptional longevity.<sup>10,11</sup>  
74 Studies of families selected for their aggregation of longevity are expected to play a key role in advancing our  
75 understanding of genetic and environmental determinants of exceptional health and survival.<sup>12-14</sup>

76 One area that has received less attention is the impact of life-course history prior to mid-life, and especially the  
77 early developmental periods.<sup>15</sup> Life-course studies in the context of exceptional longevity are often impractical  
78 due to length of follow-up, historical data and contemporary comparison cohorts required.<sup>15</sup> However,  
79 descendants of long-lived persons and longevity-enriched sibships often display similar health and metabolic  
80 profiles to their ancestors and can serve as a model for healthy ageing.<sup>16,17</sup> Multigenerational family studies in  
81 particular have proved useful for providing opportunities to circumvent these methodological challenges.<sup>18</sup>  
82 Previous findings by our group have demonstrated potent health and survival advantages across three-generations  
83 of longevity-enriched families and implicated behavioural mechanisms in the familial aggregation of this  
84 phenotype.<sup>19-22</sup> We also observed indications that the survival advantage associated with familial longevity may  
85 manifest earlier in life than previously thought, suggesting a possible developmental component to exceptional  
86 longevity.<sup>21</sup> However, the robustness, mechanisms and implications of this finding, broader health manifestations  
87 in early life, as well as transmission to subsequent generations, are currently unclear.

88 In this study we utilised a multigenerational cohort of longevity-enriched sibships and their descendants in  
89 Denmark to broadly assess early developmental health trajectories associated with the familial aggregation of  
90 longevity. Administrative registers covering all residents of Denmark facilitated linkage of our cohort to its fourth-  
91 generation descendants and comparisons with the general population. Clinical registries established in the 1970s  
92 permitted measurement of a range of neonatal, infant, and maternal health phenotypes in third generation (G3)  
93 grandchildren and fourth generation (G4) great-grandchildren of our cohort. We compared these to

94 demographically matched births from the general population, assessed the transmission of developmental effects  
95 over multiple generations, and explored mediating roles of maternal and paternal, socioeconomic, and behavioural  
96 factors. Lastly, we interpreted our findings in the context of research examining the relationship between early  
97 life health trajectories and adult and late-life health phenotypes.

## 98 **Materials and Methods**

### 99 **Danish Longevity-Enriched Families**

100 In this study we utilised a Danish cohort of 659 families selected for their aggregation of exceptional longevity.<sup>21</sup>  
101 The cohort is comprised of three consecutive studies, including the Danish Oldest Siblings pilot study, the  
102 Genetics of Healthy Aging study, and the Danish participants of the National Institute of Aging's Long Life  
103 Family Study (LLFS).<sup>13</sup> Overall, the cohort's families contained two or more siblings that reached  $88 \geq$  years  
104 of age and were alive at the time of recruitment between 2006-2009. However, 99.5% had two or more  
105 siblings in the proband generation who survived until at least 90 years of age.

106 In collaboration with the LLFS, this larger cohort of 659 Danish families (78 of whom participate directly in  
107 LLFS) has been employed as an ancillary resource to further study exceptional aging. The cohort facilitates  
108 population-based follow-up of longevity-enriched families with minimal attrition as well as comparisons with the  
109 general population through a system of national registries. Ascertainment of 2<sup>nd</sup> generation (G2) offspring and 3<sup>rd</sup>  
110 (G3) generation grandchildren through the Danish Civil Registration System has been described elsewhere and  
111 feature in a range of published research activities.<sup>21,23</sup> In this study we extended the cohort through the same  
112 process to include the 4<sup>th</sup> generation (G4) great-grandchildren (See Figure 1).

### 113 **Study Design**

114 We performed a matched cohort study in the Danish population between 1<sup>st</sup> January 1973 to 31<sup>st</sup> December 2018.  
115 The Danish Medical Birth Registry was used to identify and extract information on live births in Denmark since  
116 1973.<sup>24</sup> The Danish National Patient Registry was used to ascertain additional conditions associated with  
117 childbirth, based on diagnoses listed on inpatient hospitalisations since 1977.<sup>25</sup> The Civil Registration System  
118 (CRS) was used to determine status across follow-up, including death and emigration.<sup>23</sup> Data on parental  
119 education history was obtained from the Population Education Register, with coverage exceeding 90% of the  
120 population.<sup>26</sup> Education levels were defined according to the 2011 International Standard Classification of  
121 Education and coded as the highest attained level between the mother or father in our analyses.

122 Our source population included all live births in Denmark between 1<sup>st</sup> January 1973 and 31<sup>st</sup> December 2018 with  
123 complete data on parity, maternal birth date, and maternal country of birth. Live births from Danish LEFs were  
124 compared to demographically matched live births from the general population at a 1:2 ratio. Matching criteria

125 included sex, birth year, birth season, maternal birth year, maternal parity and whether the mother was born in  
126 Denmark or abroad. Participants who couldn't be matched on these criteria were removed (see Sensitivity  
127 Analyses).

## 128 **Outcomes**

129 Our primary outcome was infant mortality, defined as death within the first 365 days of life observed in the Civil  
130 Registration System. Secondary neonatal outcomes included preterm birth, small for gestational age, large for  
131 gestational age, low Apgar score, birth trauma, neonatal respiratory disorders, congenital malformations, and other  
132 neonatal morbidity. We also assessed several maternal outcomes including assisted delivery, caesarean section  
133 delivery, preeclampsia and eclampsia, placental disorders, haemorrhage, and other maternal morbidity. Outcomes  
134 for 'other neonatal morbidity' and 'other maternal morbidity' were included in our study to provide the broadest  
135 scope for assessing health differences and included all adverse conditions related to the pregnancy, delivery and  
136 health of the neonate outside of those listed above (see Supplementary Material Table S1.2).

137 Preterm birth was defined as delivery prior to the end of 37<sup>th</sup> week of gestation. Small and large for gestational  
138 age were defined as belonging to the below the 10<sup>th</sup> and above the 90<sup>th</sup> percentiles respectively of birth weights  
139 for gestational age calculated from intrauterine growth curves based on ultrasonically estimated foetal weights.<sup>27</sup>  
140 Low Apgar score was defined as a value of below 7 as measured after 5 minutes following delivery. Outcomes  
141 based on gestational age, weight for gestational age, and Apgar scores were available since the initiation of the  
142 Medical Birth Registry in 1973.<sup>24</sup> All remaining neonatal and maternal outcomes were based on inpatient  
143 diagnoses observed in the National Patient Registry and were only available since 1977. Neonatal events were  
144 defined as those occurring in the first 28 days of life, and maternal events as occurring at any point during  
145 pregnancy, delivery, or the puerperium (up to 6 weeks following delivery). Full ICD-8 (1973-1992) and ICD-10  
146 (1993-2018) codes used to define our outcomes and further explanations are presented in the Supplementary  
147 Material (Table S1.2).

148 We also assessed differences in maternal smoking and parental education levels between longevity-enriched  
149 families and the general population, as indicators of behavioural and socioeconomic characteristics. Maternal  
150 smoking during pregnancy is likely a causal determinant of a range of adverse neonatal and infant health  
151 outcomes, but may also serve as a proxy for other behavioural manifestations associated with poor health.<sup>28,29</sup>  
152 Data on maternal smoking was only available since 1991 in the Medical Birth Registry and was classified as a



153 binary variable indicating any amount of smoking in any of the trimesters of pregnancy, regardless of later  
154 cessation. Parental education data was obtained from the Population Education Register and coded with the  
155 following categories: ‘Primary or Lower Secondary’, ‘Upper Secondary’, ‘Short Cycle Tertiary’, ‘Bachelor or  
156 Equivalent’, ‘Master, Doctoral or Equivalent’.

## 157 **Statistical Analyses**

158 Differences in outcomes between G3 grandchildren and G4 great-grandchildren of longevity-enriched sibships  
159 and matched controls were assessed by Cox proportional hazard, conditional logistic, multinomial and ordinal  
160 logistic regression models.

161 For analyses of infant mortality, matched sets were followed up until whichever came first out of death,  
162 emigration, 365 days after birth, or the end of the observed data and analysed by Cox regression models. For  
163 analyses of neonatal and maternal morbidities, as well as maternal smoking, outcomes were treated as binary and  
164 estimated by conditional logistic regression models. For analyses of parental education level, the outcome was  
165 treated as categorical and were estimated by multinomial and ordinal logistic regression models.

166 All models accounted for the matching variables via stratification, and estimated robust standard errors clustered  
167 on maternal ID to account for several births involving the same mother. Where applicable, we also calculated  
168 separate estimates with further adjustment for parental education level at time of birth, except for analyses where  
169 this was the outcome. Analyses of neonatal and maternal morbidities as secondary outcomes were adjusted for  
170 multiple testing via the Hommel method, which assumes that outcomes are non-negatively correlated ( $n_{\text{outcomes}} =$   
171  $14$ ).<sup>30,31</sup>

172 Differences in maternal or paternal lines of transmission of infant phenotypes were assessed via interaction  
173 models. Separate estimates were provided for subgroups where the mother or father was a descendant of a  
174 longevity-enriched sibship compared to a marry-in. In the presence of no interactions, this would suggest an equal  
175 role for maternal and paternal factors in the transmission of exceptional survival and health in the neonatal and  
176 infant periods. We apply this methodology to analyses of infant survival and maternal smoking, and also to  
177 analyses of overall neonatal and maternal morbidities in the Supplementary Material (see Sensitivity Analyses).

178 Patterns of transmission of health and survival advantages across generations in longevity-enriched families were  
179 assessed by directly comparing G3 grandchildren and G4 grandchildren in calendar periods where these  
180 successive generations have overlapping birth cohorts (approx. 1973 – 2010). We performed regression analyses

181 with statistical adjustment for the same covariates used as matching criteria when selecting general population  
182 controls. Since this included birth year, these analyses were robust to changes in secular trends in the background  
183 population over the same period. A range of supplementary analyses were conducted to assess the suitability and  
184 robustness of this approach (see Sensitivity Analyses).

185 All statistical analyses were conducted in the R Statistical Software (v4.2.3; R Core Team 2023). All confidence  
186 intervals and two-sided hypothesis tests were provided at 95% and 5% levels respectively.

## 187 **Sensitivity Analyses**

188 We performed several sensitivity analyses to assess the robustness of our results. First, we assessed the impact of  
189 including children who were unable to be matched initially, by weakening their matching criteria and then appending  
190 them to our fully matched data and repeating key analyses. We then assessed longer windows of opportunity for  
191 the diagnosis of congenital malformations. We also examined mean differences in continuous rather than  
192 dichotomized outcomes where possible. Outcomes with incomplete data were also analysed to determine if their  
193 observations were missing at random and, if so, the direction of potential biases. We assessed robustness to  
194 adjustment for paternal country of birth and age at conception. For outcomes based on birth weight, we also  
195 evaluated more granular subgroups, for example very and extremely small for gestational age, and low birth  
196 weight in general. To capture broad patterns in neonatal and maternal morbidities, we assessed health advantages  
197 based on various composite scores comprised of the individual neonatal and maternal endpoints included in our  
198 study.

199 Lastly, we assessed the robustness of our ‘direct comparison’ methodology via use of several negative control  
200 analyses. These analyses tested whether our results were biased by the known secular trends of improved neonatal  
201 outcomes and infant survival throughout the study period. First, as described in the statistical analyses section, we  
202 directly compared G3 grandchildren to G4 great-grandchildren in calendar periods where these successive  
203 generations have overlapping birth cohorts (approx. 1973 – 2010). These analyses statistically adjusted for the  
204 same criteria used in our previous matched analyses, including birth year, birth season, sex, maternal age and  
205 parity. We then compared G3 matched controls to G4 matched controls using the same models where, if they  
206 adequately adjust for the confounding induced by matching (e.g. different distributions of maternal age and  
207 parity), no differences in survival should be observed. Several other comparisons were also conducted for  
208 completeness. More information on all these analyses can be found in Section 3 of the Supplementary Material.

## 209 **Results**

### 210 **Study Population**

211 Our source population included the entire population living in Denmark since 1968. After extending our cohort  
212 of longevity-enriched families to the great-grandchildren, we identified a total of 10,623 third-generation (G3)  
213 grandchildren (born between 1950 and 2010) and 16,586 fourth-generation (G4) great-grandchildren (born  
214 between 1970 and 2018) (See Figure 1). From this cohort, we selected live births occurring in Denmark between  
215 1<sup>st</sup> January 1973 and 31<sup>st</sup> December 2018 and removed observations with invalid CPR numbers or incomplete  
216 data on matching criteria in the Medical Birth Registry. The resulting sample included 5,718 grandchildren and  
217 14,968 great-grandchildren from longevity-enriched families (LEFs), and 980,232 potential control births from  
218 the general population.

219 After matching children from LEFs to controls from the general population at a 1:2 ratio, 141 were unable to be  
220 matched (see Sensitivity Analyses). Our final study population included a total of 61,635 live births from a total  
221 of 51,234 unique mothers. This included 5,637 grandchildren and 14,908 and great-grandchildren of longevity-  
222 enriched families and 41,090 matched controls. Figure S1.1 of the Supplementary Material describes the selection  
223 process used in this study in detail and loss of participants for each criterion.

224 Table 1 describes the baseline birth characteristics of the final matched cohorts analysed for this study. Minimal  
225 differences in maternal age at conception were due to matching on birth year. Parity was higher in G3  
226 grandchildren (0.93) compared to G4 great-grandchildren (0.69) as we only included births since 1973, once the  
227 Danish Medical Birth Registry had been established.<sup>24</sup> Births before this year were excluded and thus the G3  
228 grandchildren included in our study were less likely to first child compared to the G4 great-grandchildren.

229 Figure 1 describes the distribution of birth years in all four generations of LEFs in our source cohort. Years 1973-  
230 2010 represent a period of overlap between the two generations also with observation time in our study. We use  
231 this overlapping period to assess the transmission of survival and health patterns across generations in longevity-  
232 enriched families, and perform analyses which were independent of secular changes in the background population  
233 occurring over the same period.

234

235

236 **Table 1.** Baseline characteristics of liveborn children and matched controls, stratified by grandchildren and great-  
 237 grandchildren of longevity-enriched sibships

| Characteristic                    | G3 Grandchildren |              | G4 Great-grandchildren |              |
|-----------------------------------|------------------|--------------|------------------------|--------------|
|                                   | LEF              | Control      | LEF                    | Control      |
| Number of live births             | 5637             | 11274        | 14908                  | 29816        |
| Birth Year (n, %)                 |                  |              |                        |              |
| 1973-1976                         | 1509 (26.8)      | 3018 (26.8)  | 22 (0.1)               | 44 (0.1)     |
| 1977-1980                         | 1195 (21.2)      | 2390 (21.2)  | 87 (0.6)               | 174 (0.6)    |
| 1981-1984                         | 890 (15.8)       | 1780 (15.8)  | 266 (1.8)              | 532 (1.8)    |
| 1985-1988                         | 731 (13.0)       | 1462 (13.0)  | 594 (4.0)              | 1188 (4.0)   |
| 1989-1992                         | 583 (10.3)       | 1166 (10.3)  | 1088 (7.3)             | 2176 (7.3)   |
| 1993-1996                         | 378 (6.7)        | 756 (6.7)    | 1624 (10.9)            | 3248 (10.9)  |
| 1997-2000                         | 194 (3.4)        | 388 (3.4)    | 1991 (13.4)            | 3982 (13.4)  |
| 2001-2004                         | 98 (1.7)         | 196 (1.7)    | 2290 (15.4)            | 4580 (15.4)  |
| 2005-2008                         | 39 (0.7)         | 78 (0.7)     | 2451 (16.4)            | 4902 (16.4)  |
| 2009-2012                         | 13 (0.2)         | 26 (0.2)     | 2172 (14.6)            | 4344 (14.6)  |
| 2013-2018                         | 7 (0.1)          | 14 (0.1)     | 2323 (15.6)            | 4646 (15.6)  |
| Birth Season (n, %)               |                  |              |                        |              |
| Autumn                            | 1302 (23.1)      | 2604 (23.1)  | 3681 (24.7)            | 7362 (24.7)  |
| Spring                            | 1566 (27.8)      | 3132 (27.8)  | 3785 (25.4)            | 7570 (25.4)  |
| Summer                            | 1471 (26.1)      | 2942 (26.1)  | 3985 (26.7)            | 7970 (26.7)  |
| Winter                            | 1298 (23.0)      | 2596 (23.0)  | 3457 (23.2)            | 6914 (23.2)  |
| Maternal Age (sd)                 | 29.44 (4.71)     | 29.42 (4.71) | 30.15 (4.53)           | 30.15 (4.53) |
| Parity (sd)                       | 0.93 (0.90)      | 0.93 (0.90)  | 0.69 (0.79)            | 0.69 (0.79)  |
| Danish Mother (n, %)              | 5514 (97.8)      | 11028 (97.8) | 14376 (96.4)           | 28752 (96.4) |
| Male (n, %)                       | 2824 (50.1)      | 5648 (50.1)  | 7661 (51.4)            | 15322 (51.4) |
| Highest Parental Education (n, %) |                  |              |                        |              |
| Primary or Lower Secondary        | 674 (12.1)       | 1703 (15.2)  | 767 (5.1)              | 2437 (8.2)   |
| Upper Secondary                   | 2476 (44.3)      | 5272 (47.2)  | 5629 (37.8)            | 12282 (41.3) |
| Short cycle tertiary              | 343 (6.1)        | 548 (4.9)    | 943 (6.3)              | 2065 (6.9)   |
| Bachelor or equivalent            | 1458 (26.1)      | 2601 (23.3)  | 4307 (28.9)            | 7780 (26.1)  |
| Master or equivalent              | 623 (11.1)       | 1016 (9.1)   | 3002 (20.1)            | 4845 (16.3)  |
| Doctoral or equivalent            | 16 (0.3)         | 25 (0.2)     | 258 (1.7)              | 363 (1.2)    |
| Maternal Smoking Status           |                  |              |                        |              |
| Current smoker                    | 192 (21.8)       | 452 (26.0)   | 1597 (12.9)            | 4240 (17.1)  |
| Not a current smoker              | 689 (78.2)       | 1285 (74.0)  | 10803 (87.1)           | 20543 (82.9) |
| LEF Mother (n, %)                 | 2432 (43.1)      | -            | 7786 (52.2)            | -            |

238 Abbreviations: G3 (Generation 3), G4 (Generation 4), LEF (Longevity-enriched Family)

239 **Figure 1.** Distribution by birth year of successive generations descending from a proband cohort of longevity-  
240 enriched sibships

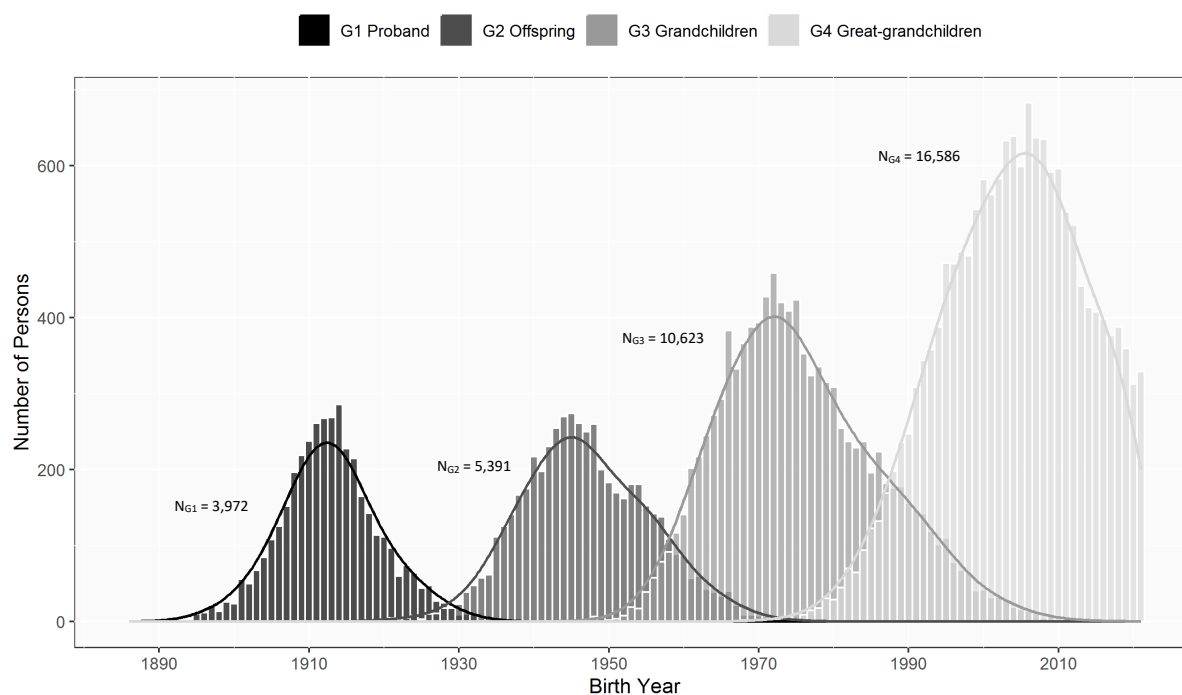

241

242 Abbreviations: G1-G4 (Generations 1-4)

## 243 Infant Survival

244 Figure 2 shows Kaplan-Meier cumulative survival estimates with 95% confidence intervals for the first 365 days  
245 of life, stratified by generation. Figure 3 describes hazard ratios estimating differences in survival in the first 365  
246 days of life by generation, and further stratified by whether the mother or father was the descendent of a longevity-  
247 enriched sibship. Figure 2 shows strong divergence of survival curves between G3 grandchildren and general  
248 population controls within the first 30 days of life, with parallel trends thereafter. However, strong separation was  
249 not observed between survival curves when comparing G4 great-grandchildren to their matched controls.

250 G3 grandchildren had approximately half the mortality of controls (HR = 0.53, 95% CI [0.36, 0.77]), and no  
251 evidence of differential effects dependent on LEF status of the mother or father (Interaction = 1.06, 95% CI [0.50,  
252 2.28]). G4 great-grandchildren had a weaker association (HR = 0.90, 95% CI [0.70, 1.17]), and similarly, no  
253 evidence of an interaction depending on maternal or paternal LEF status (HR = 1.08, 95% CI [0.64, 1.82]). All  
254 estimates were robust to further adjustment for highest attained parental level of education.

255

256 **Figure 2.** Kaplan-Meier cumulative survival estimates (95% CI) for G3 grandchildren and G4 great-grandchildren  
 257 of longevity-enriched sibships and matched controls during the infant period

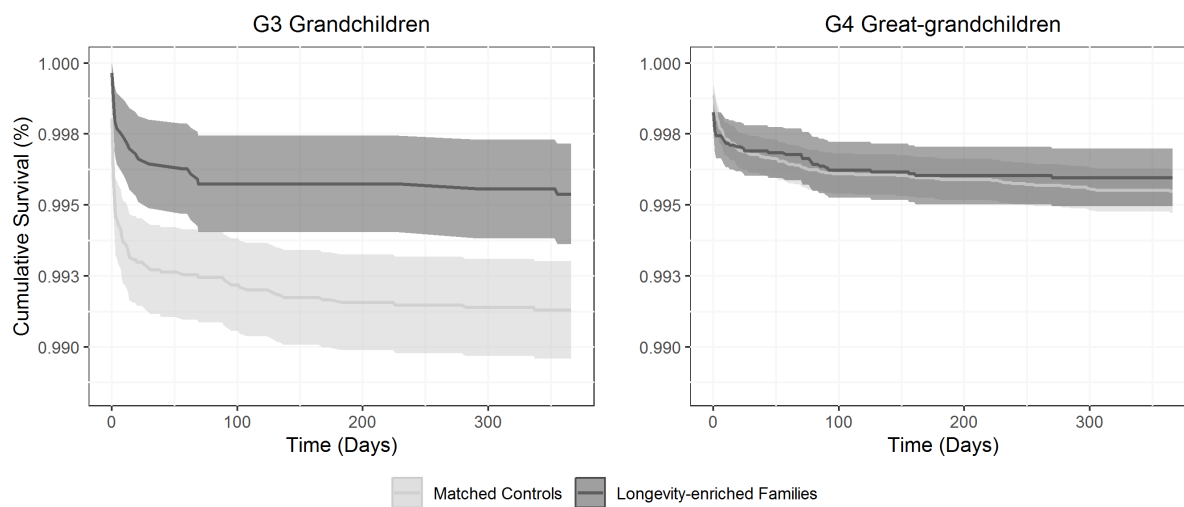

258

259 Abbreviations: G3 (Generation 3), G4 (Generation 4)

260 **Figure 3.** Cox regression analyses of infant survival comparing G3 grandchildren and G4 great-grandchildren of  
 261 longevity-enriched sibships to matched controls

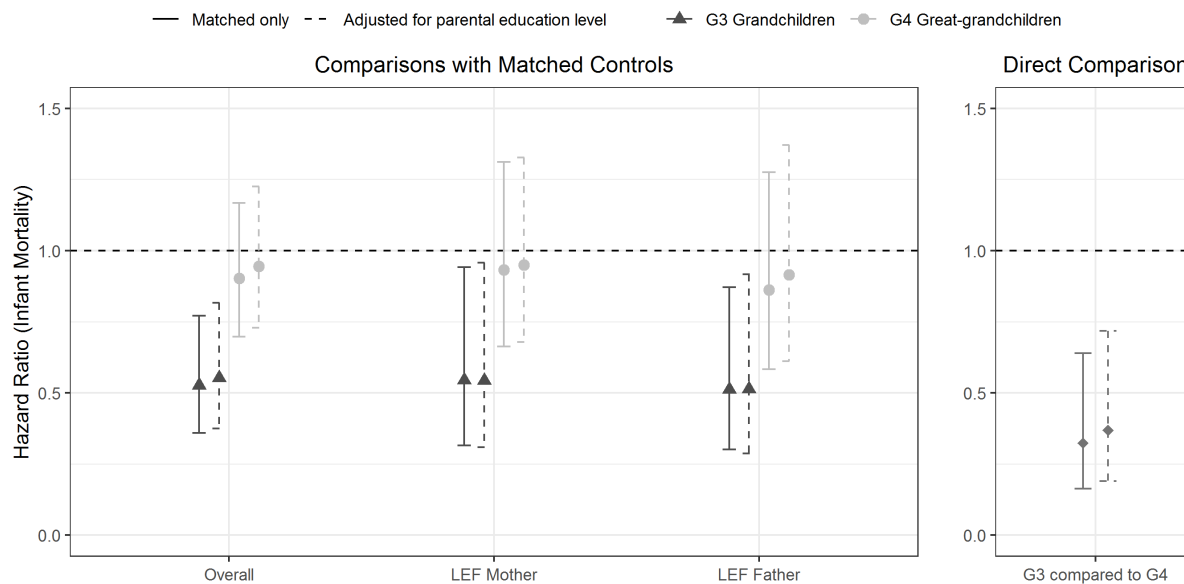

262

263 Abbreviations: G3 (Generation 3), G4 (Generation 4), LEF (Longevity-enriched Family)

264 'Direct comparison' compares G3 grandchildren to G4 great-grandchildren directly within the time periods where the two generations have overlapping birth cohorts (  
 265 approx. 1973-2010, see Figure 1).

266

267 The Kaplan Meier survival curves in Figure 2 suggest that baseline survival was approximately equal in LEF  
268 grandchildren and great-grandchildren, possibly indicating that it was changes in the control group that was  
269 determining the dilution of the relative advantage in infant survival across generations. To test this hypothesis,  
270 we utilised the period of overlapping birth years between the two generations to perform an analysis directly  
271 comparing LEF grandchildren and great-grandchildren (see ‘Direct Comparison’ in Figure 3). Here, we observed  
272 a substantial reduction in mortality in G3 grandchildren compared to G4 great-grandchildren (HR = 0.32, 95% CI  
273 [0.16, 0.64]), independent of secular trends in the background population. This suggests there was a strong  
274 dilutionary effect in the infant survival advantage reflecting a loss of protective factors otherwise present in  
275 previous generations. Table S3.2 of the Supplementary Material describes a range of negative control sensitivity  
276 analyses that support this inference.

### 277 **Neonatal and Maternal Outcomes**

278 Figure 4 displays odds ratios (ORs) from conditional logistic regression analyses of specific neonatal outcomes  
279 occurring in the first 28 days of life, or maternal outcomes throughout pregnancy, delivery and the puerperium.  
280 All ORs compared outcomes in live births of descendants of longevity-enriched sibships to those from the general  
281 population and were grouped by generation and adjustment for highest parental education level.

282 **Figure 4.** Conditional logistic regression analyses of neonatal and maternal outcomes in G3 grandchildren and  
283 G4 great-grandchildren of longevity-enriched sibships compared to matched controls

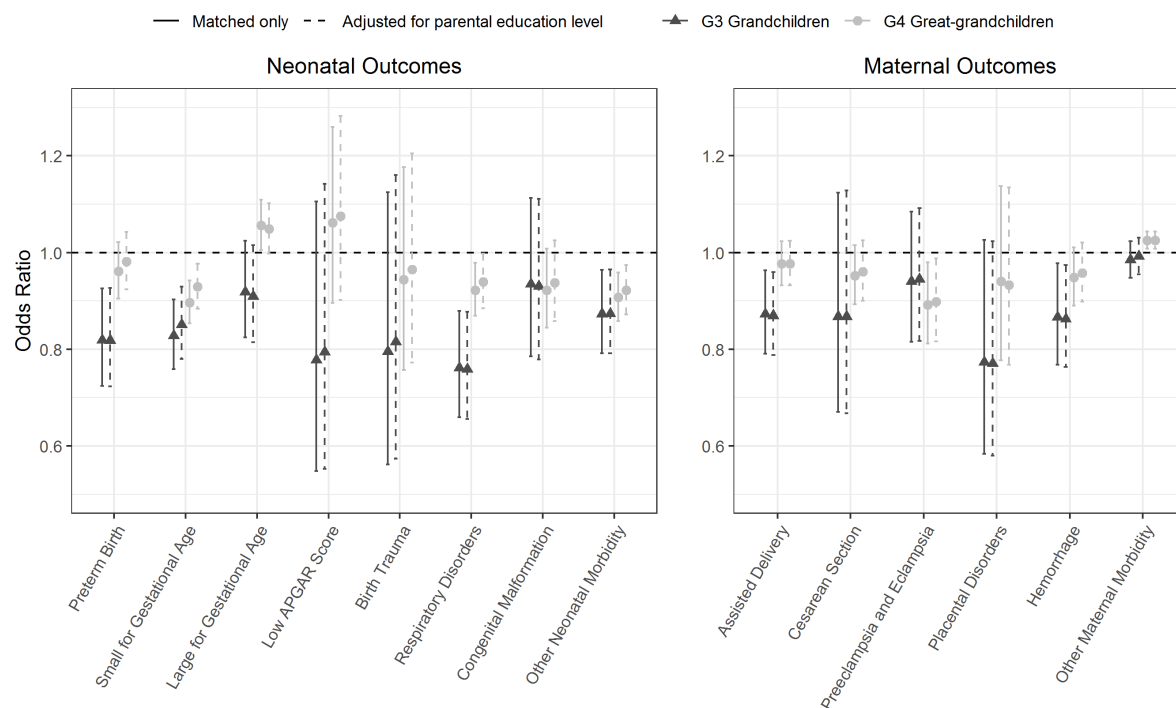

284

285 Abbreviations: G3 (Generation 3), G4 (Generation 4)

286 In G3 grandchildren, notable reductions were observed for preterm birth (OR = 0.82, 95% CI [0.72, 0.93]), small  
 287 for gestational age (OR = 0.83, 95% CI [0.76, 0.90]), neonatal respiratory disorders (OR = 0.77, 95% CI [0.67,  
 288 0.88]), other neonatal morbidity (OR = 0.87, 95% CI [0.79, 0.96]), assisted delivery (OR = 0.87, 95% CI [0.79,  
 289 0.96]), and haemorrhage (OR = 0.87, 95% CI [0.77, 0.98]). However, all other associations were also negative in  
 290 effect, implying a general trend towards reduced risk across a wide range of adverse birth outcomes. In G4 great-  
 291 grandchildren, signals of risk reduction were weaker in magnitude and less consistent but were notable in the case  
 292 of small for gestational age (OR = 0.90, 95% CI [0.85, 0.94]), neonatal respiratory disorders (OR = 0.92, 95% CI  
 293 [0.87, 0.98]), and other neonatal morbidity (OR = 0.91, 95% CI [0.86, 0.96]). Minimal changes were observed  
 294 after adjusting for parental education levels in both generations, suggesting a lack of confounding by parental  
 295 socioeconomic status, as in the previous analyses of infant mortality.

296 After adjustment for multiple testing ( $n_{outcomes} = 14$ ) and applying a 5% significance threshold, statistically  
 297 significant differences were observed only in the following outcomes for G3 grandchildren (preterm birth, small  
 298 for gestational age, and neonatal respiratory disorders) and G4 great-grandchildren (small for gestational age and  
 299 other neonatal morbidity). Tables S2.3 and S2.4 of the Supplementary Material present estimates and adjusted p-  
 300 values for all these analyses. Items S2.6-S2.9 of the Supplementary Material describe analyses of composite  
 301 outcomes of neonatal and morbidity based on the individual measures included here.



## 302 Maternal Smoking and Parental Education

303 Figure 5 describes the longitudinal completeness of data measuring maternal smoking behaviour in the Medical  
 304 Birth Registry, and analyses comparing exposure to maternal smoking in mothers of LEF children compared to  
 305 the general population. Data on maternal smoking was only available since 1991 but was also uniquely missing  
 306 in 1997. The prevalence of maternal smoking was consistently lower in mothers of G3 grandchildren (OR = 0.80,  
 307 95% CI [0.69, 0.92]) and G4 great-grandchildren (OR = 0.75, 95% CI [0.71, 0.79]) of longevity-enriched sibships.  
 308 These differences were attenuated after adjustment for parental education for both G3 grandchildren (OR = 0.83,  
 309 95% CI [0.72, 0.96]) and G4 great-grandchildren (OR = 0.84, 95% CI [0.80, 0.88]). Moreover, greater advantages  
 310 in this behavioural trait were observed in mothers who were descendants of longevity-enriched sibships compared  
 311 to mothers marrying into such families. Due to limited data in the births of third-generation grandchildren, we  
 312 were not able to directly assess a mediating role of maternal smoking behaviour in their advantages in specific  
 313 infant and neonatal outcomes.

314 **Figure 5.** Completeness of maternal smoking data in the medical birth registry and conditional logistic regression  
 315 analyses of exposure to maternal smoking in G3 grandchildren and G4 great-grandchildren of longevity-enriched  
 316 sibships compared to matched controls

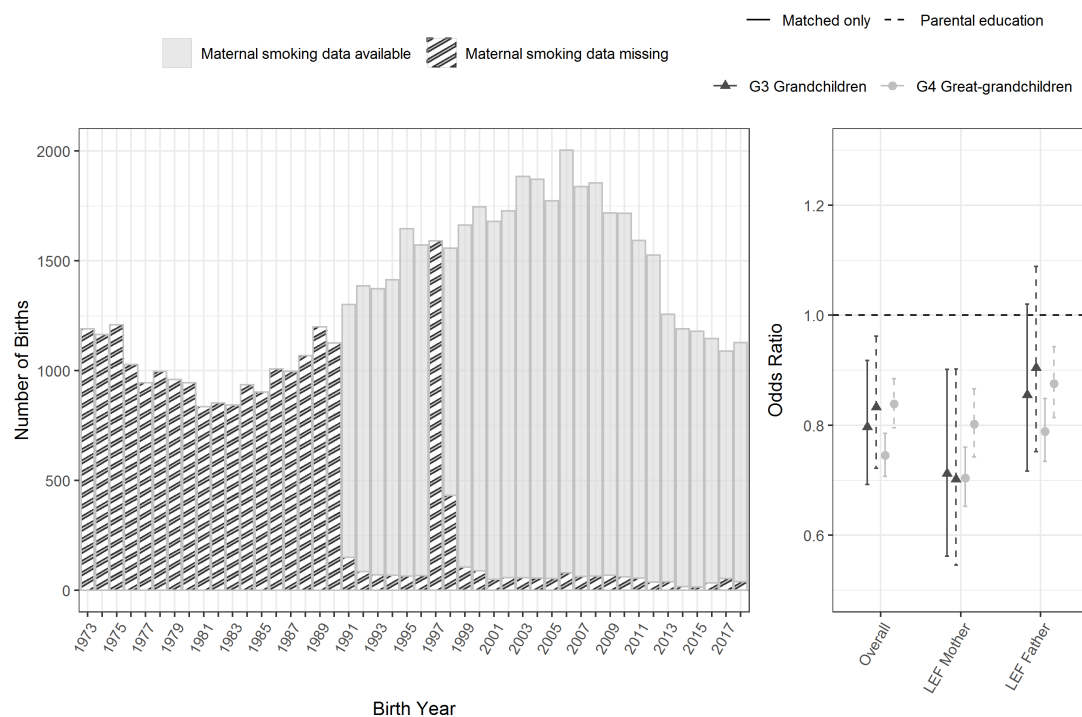

317

318 Abbreviations: G3 (Generation 3), G4 (Generation 4), LEF (Longevity-enriched Family)

319 Figure 6 describes analyses of highest attained education levels of parents of G3 grandchildren and G4 great-  
320 grandchildren of longevity-enriched sibships compared to parents of matched controls. The left panel describes a  
321 multinomial logistic regression analysis of education categories compared to primary or lower secondary  
322 education. The right panel describes the overall estimates obtained from ordinal logistic regression models with a  
323 proportional odds assumption. Parents of both G3 grandchildren and G4 great-grandchildren were more likely to  
324 have higher levels of education across all categories compared to matched controls. Assuming proportional odds  
325 between the combinations of ordinal categories, parents of both G3 grandchildren (OR = 1.28, 95% CI [1.21,  
326 1.36]) and G4 great-grandchildren (OR = 1.34, 95% CI [1.29, 1.39]) were more likely to be higher educated than  
327 parents of general population matched controls. When comparing both generations directly in their overlapping  
328 calendar periods, parents of G3 did not have different odds of having more education (OR = 0.95, 95% CI [0.86,  
329 1.06]) than parents of G4, suggesting stability of this trait over successive generations. Tables S2.4 and S2.5 of  
330 the Supplementary Material contain all estimates from our analyses of exposure to maternal smoking and parental  
331 educational attainment.

332 **Figure 6.** Multinomial and ordinal logistic regression analyses of highest attained education level in parents of  
333 G3 grandchildren and G4 great-grandchildren of longevity-enriched sibships compared to matched controls

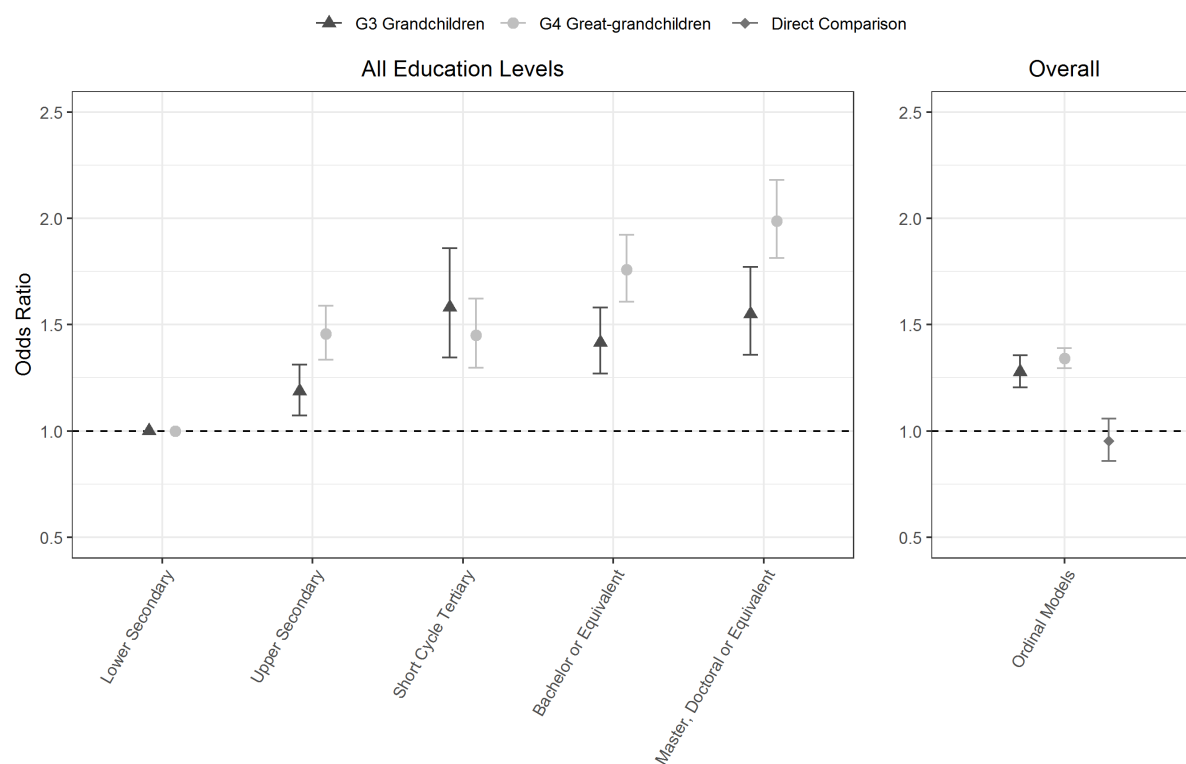

334

335 Abbreviations: G3 (Generation 3), G4 (Generation 4), LEF (Longevity-enriched Family)

336 ‘Overall’ compares the odds of having any higher level of education in parents of longevity-enriched families to parents of matched controls, assuming proportional odds  
337 between the ordered categories. ‘*Direct comparison*’ in the ‘Overall’ figure compares G3 grandchildren to G4 great-grandchildren directly within the time periods where the  
338 two generations have overlapping birth cohorts (approx. 1973-2010, see Figure 1).

### 339 **Sensitivity Analyses**

340 Our results were robust to further statistical adjustment for paternal country of birth and paternal age. Our findings  
341 on congenital anomalies were unchanged when considering longer diagnostic windows their detection. Analyses  
342 of continuous outcomes and more granular categorisations of key birth indicators (e.g., very/extremely small for  
343 gestational age) supported our primary study findings. Several outcomes with non-random missingness of data  
344 were detected and predisposed to a bias diluting the estimated protective effect against adverse outcomes in  
345 longevity-enriched families. For example, Apgar score measured after 5 minutes was disproportionately missing  
346 in those with an early neonatal death. Consistent findings were observed across analyses of composite neonatal  
347 and maternal morbidities, with various definitions including or excluding ‘other morbidity’ categories. Appending  
348 previously unmatched study participants to our data with weakly matched controls did not affect our main  
349 findings.

350 Lastly, negative control analyses of our ‘direct comparison’ methodology demonstrated that our results were not  
351 biased by secular improvements in neonatal outcomes and infant mortality when directly comparing between  
352 generations G3 and G4. This supported our interpretation that the exceptional infant phenotype is attenuated over  
353 successive generations in longevity-enriched families, and that this reflects a dilution of protective factors  
354 otherwise present in previous generations. Full reporting on our sensitivity analyses is available in sections S2  
355 and S3 of the Supplementary Material.

## 356 Discussion

357 Previous research has shown that the survival advantage in descendants of longevity-enriched sibships may  
358 manifest as early as the first year of life.<sup>21</sup> However, little is known about what factors underlie this observation,  
359 other health manifestations beyond survival, or its transmission across generations. In this study we set out to  
360 explore the early life health trajectories of descendants of longevity-enriched sibships, utilising a  
361 multigenerational cohort and national birth registries in Denmark. We analysed patterns of infant survival and  
362 adverse birth outcomes in third-generation (G3) grandchildren and fourth-generation (G4) great-grandchildren  
363 descending from a proband generation of longevity-enriched sibships (G1). Compared to live births from the  
364 general population, G3 grandchildren demonstrated reductions in the risk of infant mortality and a range of  
365 adverse birth outcomes, independent of demographic and socioeconomic factors. However, these effects were  
366 strongly attenuated in G4 great-grandchildren with weaker and less consistent effects across all outcomes studied.  
367 The infant health advantage observed in our study manifested across a diverse range of outcomes, suggesting that  
368 survival differences were not driven by protection against a narrow range of conditions related to a particular  
369 aetiology.

370 Maternal and prenatal care in Denmark has changed considerably over the observation period included in our  
371 study.<sup>32</sup> Such changes may have had differential effects depending on whether a child was born into a family with  
372 lower rather than exceptional health at baseline. Overlapping birth cohorts between successive generations in our  
373 study allowed us to directly assess the intergenerational transmission of the observed survival advantages in  
374 restricted samples, without reference to the general population. When comparing G3 grandchildren to G4 great-  
375 grandchildren within their overlapping birth cohorts (approx. birth years 1970 – 2010) we observed reduced  
376 mortality similar to the difference observed when comparing to contemporary matched controls in unrestricted  
377 samples. This methodology was also able to accurately capture expected patterns of survival when applied in a  
378 range of negative control comparisons involving G3 and G4 matched controls (Supplementary Material S3.1 and  
379 S3.2). For example, G4 great-grandchildren were not different in survival compared to G3 matched controls, nor  
380 were G3 controls different to G4 controls. The dilution of the exceptional phenotype observed in our study was  
381 thus independent of secular trends in the background population and reflected a partial loss of protective factors  
382 otherwise present in previous generations in our cohort of longevity-enriched families.

383 Maternal smoking is a well-established risk factor for adverse birth outcomes in offspring, as well as pathological  
384 sequelae in later life.<sup>29</sup> In our cohorts, we observed a lower rate of smoking during pregnancy in mothers of both

385 G3 grandchildren and G4 great-grandchildren. This finding supports previous research by our group implicating  
386 behavioural factors in the mechanisms underlying the familial aggregation of exceptional health and survival,  
387 including reduced risk of tobacco-related cancers in G2 offspring and G3 grandchildren.<sup>20,21</sup> Interestingly, the  
388 smoking advantage was present to the same degree in both generations after adjustment for parental education  
389 levels, suggesting stability of this behavioural trait over successive generations. Furthermore, we observed a  
390 greater advantage in mothers who were a descendent of a longevity-enriched sibship, as opposed to mothers who  
391 married into such families. Both were superior to general population controls, suggesting a role for shared  
392 environmental effects, assortative mating, and or indirect genetic effects in the aggregation of positive behavioural  
393 traits in longevity-enriched families.<sup>33,34</sup>

394 Spouses marrying into our cohort of longevity-enriched families exhibit survival that is less exceptional than their  
395 partners, but greater than the general population.<sup>35</sup> This relatively smaller advantage likely contributes to the  
396 dilution of exceptional health and survival across successive generations.<sup>14,36,37</sup> Thus, we tested the relative  
397 importance of cumulative maternal versus paternal factors in the transmission of the exceptional infant phenotype  
398 by comparing children with mothers versus fathers descending from a longevity-enriched family.<sup>38</sup> Remarkably  
399 similar patterns of infant survival were observed in both groups. This finding interpreted in isolation may suggest  
400 either a negligible effect of *parental* environment factors relative to heritable factors, or an approximately equal  
401 role of both paternal and maternal environmental factors. Due to mixed evidence across generations, we could not  
402 rule out modest differences in the importance of maternal and paternal environmental factors in transmission for  
403 other neonatal outcomes (see Supplementary Material S2.6 – S2.9).

404 Infant health outcomes have a proximal and limited range of determinants and depend less on complex interactions  
405 between factors later on in the life course, such as behaviour.<sup>39</sup> These proximal factors include strictly biological  
406 genetic and epigenetic factors directly transmitted from parent to offspring, as well as environmentally mediated  
407 factors relating to foetal nutrition, maternal behaviour and health during pregnancy, and the early postnatal  
408 environment. In our cohort, we observed an infant health and survival advantage declining across successive  
409 generations with increasing distance from the longevity-enriched proband sibships. This pattern likely reflected a  
410 partial loss of protective factors otherwise present in previous generations. We also observed remarkably  
411 consistent advantages in behavioural and socioeconomic indicators in the parents of both G3 grandchildren and  
412 G4 great-grandchildren. This suggests that maternal smoking and education level, as well as other factors proxied  
413 by their measurement, were not primary drivers of the exceptional infant phenotype observed in G3 grandchildren.

414 Lastly, we observed strong similarity in maternal and paternal lines of transmission, despite the known  
415 vulnerability of the foetus to maternal nutrition and physiology.<sup>38</sup> This is likely best interpreted as minimising the  
416 role of environmentally mediated factors in the mechanisms underlying the exceptional infant phenotype in this  
417 study.

418 These patterns in our view strongly implicate heritable genetic and/or epigenetic factors in the transmission of the  
419 exceptional infant phenotype in our cohort of longevity-enriched families. This discussion pertains to the  
420 developmental mechanisms driving the infant health advantage specifically, and do not preclude an increasingly  
421 important role for behaviourally mediated effects manifesting directly in childhood and beyond, or indirectly  
422 through the familial environment. Indeed, research by our group has identified patterns of disease risk and family  
423 stability suggesting behaviour plays a key role in the aggregation of exceptional health and survival in longevity-  
424 enriched families.<sup>20,21</sup> Although we were unable to observe G2 offspring and G1 sibships in their developmental  
425 periods, we have previously shown a similar dilution of adult mortality across generations G2 and G3.<sup>21</sup> It is likely  
426 that part of this dilution may also be due to a partial loss of heritable genetic and or epigenetic protective factors.  
427 However, the relationship between these complex factors and how they interact throughout the life course in the  
428 familial aggregation of longevity is currently unknown. An important avenue for future research will be to assess  
429 the health and survival trajectories of G4 great-grandchildren and G3 grandchildren throughout mid- and late-life  
430 respectively.

431 The idea that environmental conditions in early life can directly influence health and functioning later in life has  
432 been subject to investigation and embraced by a range of scientific disciplines. Studies of prospective cohorts,  
433 experimental manipulation in model organisms, and quasi-random environmental shocks in early life (e.g. famine,  
434 business cycles, and natural disasters) have coalesced to form the framework for the Developmental Origins of  
435 Health and Disease (DOHaD) hypothesis.<sup>40</sup> Maladaptive responses to developmental cues, generally meant to  
436 preserve genotypic variation in the face of transitory environmental changes, are likely central to this  
437 phenomenon.<sup>41</sup> Developmental effects have been implicated in a range of adult diseases including cardiovascular  
438 and metabolic disease, cancer, and neuropsychiatric conditions.<sup>42</sup> Epigenetic mechanisms are suspected to play  
439 an important role in observations of multigenerational and transgenerational effects arising from developmental  
440 exposures in particular.<sup>43</sup>

441 Results from the present study and previous research by our group point to a highly favourable profile of parental  
442 risk factors which are commonly implicated in developmental mechanisms of intergenerational disease

443 transmission.<sup>21</sup> For example, G2 offspring and G3 grandchildren in our cohort exhibit lowered risk of disease  
444 incidence and mortality due to mental and behavioural disorders, cardiovascular and endocrine diseases, and  
445 infections during adulthood.<sup>21</sup> Social stress, substance abuse, infections, and cardiometabolic disease have all been  
446 established as probable causative factors within the DOHaD framework.<sup>44-47</sup> Interestingly, measurable changes in  
447 common birth outcomes are not necessary for long-term physiological changes in response to an adverse prenatal  
448 and early postnatal conditions.<sup>48</sup> From these perspectives, our findings suggest that the familial aggregation of  
449 exceptional longevity may have developmental origins as early as the perinatal period.

450 To our knowledge, this is the first study to comprehensively assess early life health trajectories associated with  
451 familial aggregation of longevity.<sup>49,50</sup> Such efforts have previously not been feasible due to a lack of prospective  
452 cohorts or clinical birth registries with sufficient history of follow-up.<sup>15</sup> In our view, the patterns of transmission  
453 between generations G3 and G4 observed in our study predict certain trends in early life health trajectories of  
454 previous generations, which we were unable to directly observe. Specifically, it is likely that the phenotype  
455 observed in G3 grandchildren in our cohort may represent a conservative portrayal of the G2 offspring and G1  
456 proband generations in their unobserved perinatal and infant periods. In this way, extrapolations of our findings  
457 could aid in developing our scientific knowledge of early life health trajectories more directly associated with  
458 phenotypic longevity. However, it remains unknown to what extent such exceptional infant phenotypes predict  
459 familial aggregation of longevity within a single generation, and this would be an important avenue for future  
460 research, once methodologically feasible to do so.

461 This study had several important strengths and limitations. Due to the nationwide scope our study and the  
462 population-based ascertainment of our cohort, there was minimal attrition in the follow-up of descendants of the  
463 proband longevity-enriched sibships. Our use of national birth and patient registries permitted analyses of  
464 clinically measured outcomes over successive generations and facilitated comparisons with the general Danish  
465 population. However, data on maternal smoking during pregnancy was missing for a large portion of the G3  
466 generation. Thus, we could not perform reliable analyses assessing its mediating role across a variety of  
467 statistically important differences. Smoking data for both generations was only available with binary  
468 classification, and this may have missed differences in more granular measures, including trajectories of smoking  
469 cessation across the trimesters of pregnancy. Lastly, our inferences based on patterns of maternal smoking and  
470 behavioural indicators over successive generations may be subject to residual confounding. However, given the

471 stability of these very broad proxies, it is unlikely that more granular measurements of behaviour and  
472 socioeconomic status could explain the dilution of the exceptional infant phenotype over generations.

### 473 **Conclusion**

474 Descendants of longevity-enriched sibships exhibit a broad health advantage manifesting as early the perinatal  
475 period. The infant survival advantage in these families was driven by protection against a diverse range of adverse  
476 birth outcomes, and independent of socioeconomic and behavioural factors, as well as maternal or paternal lines  
477 of transmission. Health and survival effects were strongly diluted over successive generations, despite persistent  
478 behavioural and socioeconomic advantages. Our findings suggest that exceptional health and survival may have  
479 early developmental components and implicate heritable genetic and or epigenetic factors in their transmission.



## 480 References

- 481 1. Hitt, R., Young-Xu, Y., Silver, M. & Perls, T. Centenarians: the older you get, the healthier you have been.  
482 *The Lancet* **354**, 652 (1999).
- 483 2. Christensen, K., Doblhammer, G., Rau, R. & Vaupel, J. W. Ageing populations: the challenges ahead. *The*  
484 *Lancet* **374**, 1196–1208 (2009).
- 485 3. Beard, J. R. *et al.* The World report on ageing and health: a policy framework for healthy ageing. *The*  
486 *Lancet* **387**, 2145–2154 (2016).
- 487 4. Vaupel, J. W. *et al.* Biodemographic Trajectories of Longevity. *Science* **280**, 855–860 (1998).
- 488 5. Fraser, G. E. & Shavlik, D. J. Ten Years of Life: Is It a Matter of Choice? *Arch. Intern. Med.* **161**, 1645–  
489 1652 (2001).
- 490 6. Khaw, K.-T. *et al.* Combined Impact of Health Behaviours and Mortality in Men and Women: The EPIC-  
491 Norfolk Prospective Population Study. *PLOS Med.* **5**, e12 (2008).
- 492 7. Li, Y. *et al.* Impact of Healthy Lifestyle Factors on Life Expectancies in the US Population. *Circulation*  
493 **138**, 345–355 (2018).
- 494 8. Kvaavik, E., Batty, G. D., Ursin, G., Huxley, R. & Gale, C. R. Influence of Individual and Combined  
495 Health Behaviors on Total and Cause-Specific Mortality in Men and Women: The United Kingdom Health  
496 and Lifestyle Survey. *Arch. Intern. Med.* **170**, 711–718 (2010).
- 497 9. Christensen, K. & Vaupel, J. W. Determinants of longevity: genetic, environmental and medical factors. *J.*  
498 *Intern. Med.* **240**, 333–341 (1996).
- 499 10. Hjelmberg, J. vB. *et al.* Genetic influence on human lifespan and longevity. *Hum. Genet.* **119**, 312–321  
500 (2006).
- 501 11. van den Berg, N., Beekman, M., Smith, K. R., Janssens, A. & Slagboom, P. E. Historical demography and  
502 longevity genetics: Back to the future. *Ageing Res. Rev.* **38**, 28–39 (2017).
- 503 12. Zhang, Z. D. *et al.* Genetics of extreme human longevity to guide drug discovery for healthy ageing. *Nat.*  
504 *Metab.* **2**, 663–672 (2020).
- 505 13. Wojczynski, M. K. *et al.* NIA Long Life Family Study: Objectives, Design, and Heritability of Cross-  
506 Sectional and Longitudinal Phenotypes. *J. Gerontol. Ser. A* **77**, 717–727 (2022).
- 507 14. van den Berg, N. *et al.* Longevity defined as top 10% survivors and beyond is transmitted as a quantitative  
508 genetic trait. *Nat. Commun.* **10**, 35 (2019).

- 509 15. Power, C., Kuh, D. & Morton, S. From developmental origins of adult disease to life course research on  
510 adult disease and aging: insights from birth cohort studies. *Annu. Rev. Public Health* **34**, 7–28 (2013).
- 511 16. Aiello, A., Ligotti, M. E. & Cossarizza, A. Centenarian Offspring as a Model of Successful Ageing. in  
512 *Centenarians: An Example of Positive Biology* (ed. Caruso, C.) 35–51 (Springer International Publishing,  
513 Cham, 2019). doi:10.1007/978-3-030-20762-5\_3.
- 514 17. Bucci, L. *et al.* Centenarians' offspring as a model of healthy aging: a reappraisal of the data on Italian  
515 subjects and a comprehensive overview. *Aging* **8**, 510–519 (2016).
- 516 18. van den Berg, N. Family matters in unraveling human longevity. *Aging* **12**, 22354–22355 (2020).
- 517 19. Galvin, A. *et al.* Physical resilience after a diagnosis of cardiovascular disease among offspring of long-  
518 lived siblings. *Eur. J. Ageing* **19**, 437–445 (2022).
- 519 20. Pedersen, J. K. *et al.* Low tobacco-related cancer incidence in offspring of long-lived siblings: a  
520 comparison with Danish national cancer registry data. *Ann. Epidemiol.* **25**, 569–574.e3 (2015).
- 521 21. Christensen, K. *et al.* Mechanisms underlying familial aggregation of exceptional health and survival: A  
522 three-generation cohort study. *Aging Cell* **19**, e13228 (2020).
- 523 22. Andersen, S. L. *et al.* Personality Factors in the Long Life Family Study. *J. Gerontol. Ser. B* **68**, 739–749  
524 (2013).
- 525 23. Pedersen, C. B. The Danish Civil Registration System. *Scand. J. Public Health* **39**, 22–25 (2011).
- 526 24. Bliddal, M., Broe, A., Pottgård, A., Olsen, J. & Langhoff-Roos, J. The Danish Medical Birth Register.  
527 *Eur. J. Epidemiol.* **33**, 27–36 (2018).
- 528 25. Schmidt, M. *et al.* The Danish National Patient Registry: a review of content, data quality, and research  
529 potential. *Clin. Epidemiol.* **7**, 449–490 (2015).
- 530 26. Jensen, V. M. & Rasmussen, A. W. Danish Education Registers. *Scand. J. Public Health* **39**, 91–94 (2011).
- 531 27. Maršál, K. *et al.* Intrauterine growth curves based on ultrasonically estimated foetal weights. *Acta Paediatr.*  
532 *Int. J. Paediatr.* **85**, 843–848 (1996).
- 533 28. Avşar, T. S., McLeod, H. & Jackson, L. Health outcomes of smoking during pregnancy and the postpartum  
534 period: an umbrella review. *BMC Pregnancy Childbirth* **21**, 254 (2021).
- 535 29. Gould, G. S., Havard, A., Lim, L. L., The PSANZ Smoking in Pregnancy Expert Group & Kumar, R.  
536 Exposure to Tobacco, Environmental Tobacco Smoke and Nicotine in Pregnancy: A Pragmatic Overview  
537 of Reviews of Maternal and Child Outcomes, Effectiveness of Interventions and Barriers and Facilitators to  
538 Quitting. *Int. J. Environ. Res. Public Health* **17**, 2034 (2020).

- 539 30. Hommel, G. A Stagewise Rejective Multiple Test Procedure Based on a Modified Bonferroni Test.  
540 *Biometrika* **75**, 383–386 (1988).
- 541 31. Sarkar, S. K. & Chang, C.-K. The Simes Method for Multiple Hypothesis Testing with Positively  
542 Dependent Test Statistics. *J. Am. Stat. Assoc.* **92**, 1601–1608 (1997).
- 543 32. Vallgarda, S. Widening the scope, targeting interventions, creating risk groups: maternal and child health in  
544 Denmark and Sweden from 1930s and onwards. *J. Epidemiol. Community Health* **62**, 382–386 (2008).
- 545 33. Clarke, T.-K. *et al.* Genetic and shared couple environmental contributions to smoking and alcohol use in  
546 the UK population. *Mol. Psychiatry* **26**, 4344–4354 (2021).
- 547 34. Clark, A. E. & Etilé, F. Don't give up on me baby: Spousal correlation in smoking behaviour. *J. Health*  
548 *Econ.* **25**, 958–978 (2006).
- 549 35. Pedersen, J. K. *et al.* The Survival of Spouses Marrying Into Longevity-Enriched Families. *J. Gerontol.*  
550 *Ser. A* **72**, 109–114 (2017).
- 551 36. Mourits, R. J. *et al.* Intergenerational transmission of longevity is not affected by other familial factors:  
552 evidence from 16,905 Dutch families from Zeeland, 1812-1962. *Hist. Fam.* **25**, 484–526 (2020).
- 553 37. Berg, N. van den *et al.* Longevity Around the Turn of the 20th Century: Life-Long Sustained Survival  
554 Advantage for Parents of Today's Nonagenarians. *J. Gerontol. A. Biol. Sci. Med. Sci.* **73**, 1295–1302  
555 (2018).
- 556 38. Sharp, G. C., Lawlor, D. A. & Richardson, S. S. It's the mother!: How assumptions about the causal  
557 primacy of maternal effects influence research on the developmental origins of health and disease. *Soc. Sci.*  
558 *Med.* **1982** **213**, 20–27 (2018).
- 559 39. Kuh, D., Ben-Shlomo, Y., Lynch, J., Hallqvist, J. & Power, C. Life course epidemiology. *J. Epidemiol.*  
560 *Community Health* **57**, 778–783 (2003).
- 561 40. Wadhwa, P. D., Buss, C., Entringer, S. & Swanson, J. M. Developmental origins of health and disease:  
562 brief history of the approach and current focus on epigenetic mechanisms. *Semin. Reprod. Med.* **27**, 358–  
563 368 (2009).
- 564 41. Gluckman, P. D., Hanson, M. A. & Beedle, A. S. Early life events and their consequences for later disease:  
565 a life history and evolutionary perspective. *Am. J. Hum. Biol. Off. J. Hum. Biol. Counc.* **19**, 1–19 (2007).
- 566 42. Gillman, M. W. Developmental Origins of Health and Disease. *N. Engl. J. Med.* **353**, 1848–1850 (2005).
- 567 43. Bianco-Miotto, T., Craig, J. M., Gasser, Y. P., Dijk, S. J. van & Ozanne, S. E. Epigenetics and DOHaD:  
568 from basics to birth and beyond. *J. Dev. Orig. Health Dis.* **8**, 513–519 (2017).

- 569 44. Brunton, P. J. Effects of maternal exposure to social stress during pregnancy: consequences for mother and  
570 offspring. *Reproduction* **146**, R175–R189 (2013).
- 571 45. Khambadkone, S. G., Cordner, Z. A. & Tamashiro, K. L. K. Maternal stressors and the developmental  
572 origins of neuropsychiatric risk. *Front. Neuroendocrinol.* **57**, 100834 (2020).
- 573 46. Swanson, J. M., Entringer, S., Buss, C. & Wadhwa, P. D. Developmental Origins of Health and Disease:  
574 Environmental Exposures. *Semin. Reprod. Med.* **27**, 391–402 (2009).
- 575 47. Godfrey, K. M., Gluckman, P. D. & Hanson, M. A. Developmental origins of metabolic disease: life course  
576 and intergenerational perspectives. *Trends Endocrinol. Metab.* **21**, 199–205 (2010).
- 577 48. Hanson, M. A. & Gluckman, P. D. Developmental Origins of Health and Disease: New Insights. *Basic*  
578 *Clin. Pharmacol. Toxicol.* **102**, 90–93 (2008).
- 579 49. Vaiserman, A. M. Early-life nutritional programming of longevity. *J. Dev. Orig. Health Dis.* **5**, 325–338  
580 (2014).
- 581 50. Preston, J. D., Reynolds, L. J. & Pearson, K. J. Developmental Origins of Health Span and Life Span: A  
582 Mini-Review. *Gerontology* **64**, 237–245 (2018).
- 583

584 **Contributions:** KC, MTK, and PLS conceived the study idea. MTK, KC, MFF, MW and MP designed the study.  
585 MTK and DAP obtained and pre-processed the study data. MTK performed the data analysis and takes full  
586 responsibility for the integrity of the results. MTK and KC wrote the initial manuscript. All authors worked on  
587 subsequent iterations of the manuscript and contributed intellectual content. All authors approved the final  
588 manuscript.

589 **Data Availability Statement:** Data for this research was obtained on a per-project basis in liaison with a  
590 government agency in Denmark (Statistics Denmark) and there are strict restrictions on its use and sharing. The  
591 data cannot be deposited in a public database and exports of summary data is only allowed as material for direct  
592 use in a scientific publication.

593 **Funding:** Research reported in this publication was supported by the National Institute on Aging of the National  
594 Institutes of Health (NIA/NIH) under award number U19AG063893.

595 **Competing Interests:** No competing interests declared.

596 **Ethical Approval:** The study has been ethically approved by The Regional Scientific Ethical Committees for  
597 Southern Denmark (S-VF-20030227), The Danish Data Protection Agency (J.nr. 2008-41-1753), and University  
598 of Southern Denmark, Research & Innovation Organisation (J.nr. 10.635).

599 **Transparency:** The manuscript's guarantor (MTK) affirms that this manuscript is an honest, accurate and  
600 transparent account of the study being reported; that no important aspects of the study have been omitted; and that  
601 any discrepancies from the study as originally planned have been explained.
